# Supplementary material for: Overcoming leukemia heterogeneity by combining T cell engaging bispecific antibodies
Source: PubMed Central journal article supplement — J Immunother Cancer. 2020 Nov 25;8(2):e001626. doi: 10.1136/jitc-2020-001626 (PMC7689592; doi:10.1136/jitc-2020-001626), 2020-11-25

**Fig S1.** The combination of BC250 and T cells treat mice in several ALL xenograft mouse models *in vivo*. **(A-C)** Immunodeficient NSG mice were intravenously inoculated with CD19(+) Daudi-luciferase ( $10^6$ ), BV173-luciferase ( $10^6$ ), or Raji-luciferase ( $0.5 \times 10^6$ ). Treatment was started after 3 (**C**, Raji) or 14 (**A** and **B**, Daudi and BV173) days of leukemia inoculation. Treatment was consisted of ATC injections (3 doses each  $20 \times 10^6$  for Daudi, 1 dose of  $8.8 \times 10^6$  for BV173, or 3 doses each  $10 \times 10^6$  for Raji) with BC250 (CD3xCD19 BsAb) or the control BC119 (CD3xGD2 BsAb). Interleukin 2 was administered twice per week (1000 IU) to support ATC persistence. Leukemia growth was monitored using the IVIS bioluminescent imager.

**Fig S1**

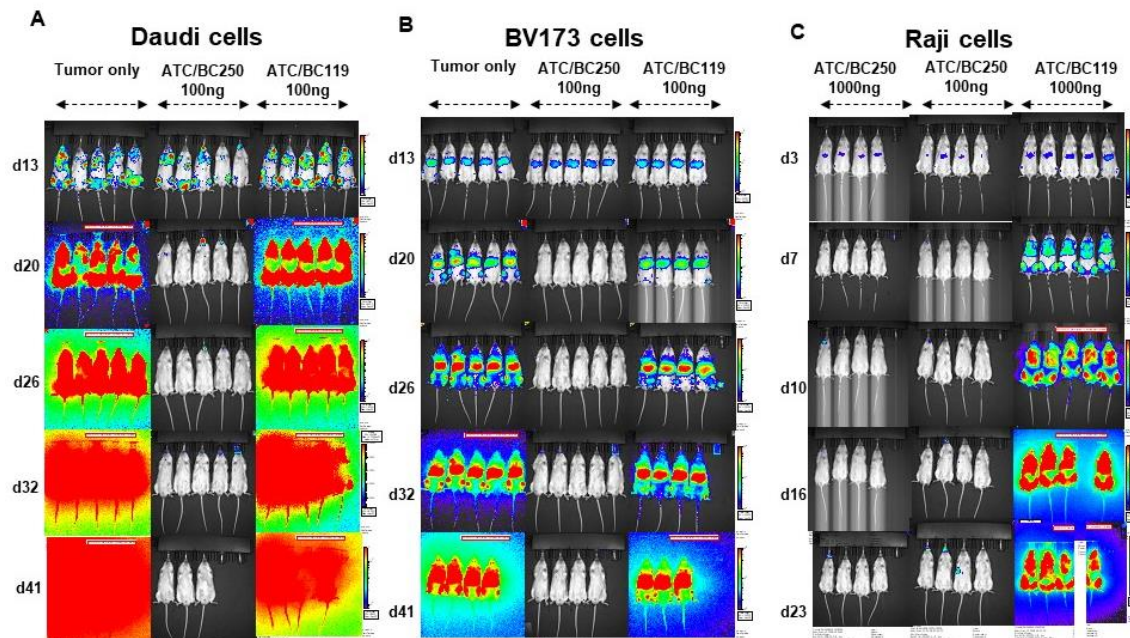

Supplement: jitc-2020-001626supp001.pdf [file jitc-2020-001626supp001.pdf]
